# Supplementary material
Source: publisher figshare collection journal article supplement (https://gsajournals.figshare.com/ndownloader/files/14964716)
Supplement: Supplementary file 1 [file 14964716]

## Sheet: Sample_Details
SRA_ID	Sample_ID	Source	Developmental_TimePoint	Treatment
SRP001844	SRR035245	Shoot apical meristem	14 days after planting	N/A
SRP001844	SRR035246	Shoot apical meristem	14 days after planting	N/A
SRP001844	SRR035247	Shoot apical meristem	14 days after planting	N/A
SRP001844	SRR035248	Shoot apical meristem	14 days after planting	N/A
SRP006463	SRR189760	Pre-emergence cob	N/A	N/A
SRP006463	SRR189761	Leaves	20 days	N/A
SRP006463	SRR189762	Preemergence tassel	N/A	N/A
SRP006463	SRR189763	Post-emergence cob	N/A	N/A
SRP006463	SRR189768	Endosperm	25 DAP	N/A
SRP006463	SRR189769	Whole anthers	N/A	N/A
SRP006463	SRR189770	Ovule	N/A	N/A
SRP006463	SRR189771	Pollen	N/A	N/A
SRP006463	SRR189772	Mature silk	N/A	N/A
SRP006463	SRR189773	Seed	10 DAP	N/A
SRP006463	SRR189774	Leaves	20 days	N/A
SRP006463	SRR393016	Postemergence tassel	N/A	N/A
SRP006463	SRR393017	Seed	5 DAP	N/A
SRP006463	SRR393018	Embryo	25 DAP	N/A
SRP006965	SRR242505	Seedling	N/A	N/A
SRP006965	SRR248565	Seedling	N/A	N/A
SRP006965	SRR250415	Seedling	N/A	N/A
SRP006965	SRR250416	Pollen	N/A	N/A
SRP006965	SRR252662	Pollen	N/A	N/A
SRP006965	SRR255405	Pollen	N/A	N/A
SRP006965	SRR254169	Embryo Sac	N/A	N/A
SRP006965	SRR254170	Embryo Sac	N/A	N/A
SRP006965	SRR254176	Embryo Sac	N/A	N/A
SRP006965	SRR254171	Ovule	N/A	N/A
SRP006965	SRR254172	Ovule	N/A	N/A
SRP006965	SRR254175	Ovule	N/A	N/A
SRP014792	SRR536834	Ovaries	1 DAP	control
SRP014792	SRR536835	Ovaries	1 DAP	control
SRP014792	SRR536836	Ovaries	1 DAP	drought
SRP014792	SRR536837	Ovaries	1 DAP	drought
SRP014792	SRR536838	Basal Leaf Meristem	1 DAP	control
SRP014792	SRR536839	Basal Leaf Meristem	1 DAP	control
SRP014792	SRR536840	Basal Leaf Meristem	1 DAP	drought
SRP014792	SRR536841	Basal Leaf Meristem	1 DAP	drought
SRP029238	SRR957415	Endosperm	12 DAP	N/A
SRP029238	SRR957416	Endosperm	12 DAP	N/A
SRP029238	SRR957417	Endosperm	12 DAP	N/A
SRP029238	SRR957418	Pericarp and aleurone	N/A	N/A
SRP029238	SRR957419	Pericarp and aleurone	N/A	N/A
SRP029238	SRR957420	Pericarp and aleurone	N/A	N/A
SRP029238	SRR957421	Endosperm crown	N/A	N/A
SRP029238	SRR957422	Endosperm crown	N/A	N/A
SRP029238	SRR957423	Endosperm crown	N/A	N/A
SRP029238	SRR957424	Symmetrical division zone	N/A	N/A
SRP029238	SRR957425	Symmetrical division zone	N/A	N/A
SRP029238	SRR957426	Symmetrical division zone	N/A	N/A
SRP029238	SRR957427	Stomatal division zone	N/A	N/A
SRP029238	SRR957428	Stomatal division zone	N/A	N/A
SRP029238	SRR957429	Stomatal division zone	N/A	N/A
SRP029238	SRR957430	Growth zone	N/A	N/A
SRP029238	SRR957431	Growth zone	N/A	N/A
SRP029238	SRR957432	Growth zone	N/A	N/A
SRP029238	SRR957433	Embryo	20 DAP	N/A
SRP029238	SRR957434	Embryo	20 DAP	N/A
SRP029238	SRR957435	Embryo	20 DAP	N/A
SRP029238	SRR957436	Embryo	N/A	N/A
SRP029238	SRR957437	Embryo	N/A	N/A
SRP029238	SRR957438	Embryo	N/A	N/A
SRP029238	SRR957439	Germinating Kernels	N/A	N/A
SRP029238	SRR957440	Germinating Kernels	N/A	N/A
SRP029238	SRR957441	Germinating Kernels	N/A	N/A
SRP029238	SRR957442	Mature leaf tissue (leaf 8)	N/A	N/A
SRP029238	SRR957443	Mature leaf tissue (leaf 8)	N/A	N/A
SRP029238	SRR957444	Mature leaf tissue (leaf 8)	N/A	N/A
SRP029238	SRR957445	6-8 mm from tip of ear primordium	N/A	N/A
SRP029238	SRR957446	6-8 mm from tip of ear primordium	N/A	N/A
SRP029238	SRR957447	6-8 mm from tip of ear primordium	N/A	N/A
SRP029238	SRR957448	2-4 mm from tip of ear primordium	N/A	N/A
SRP029238	SRR957449	2-4 mm from tip of ear primordium	N/A	N/A
SRP029238	SRR957450	2-4 mm from tip of ear primordium	N/A	N/A
SRP029238	SRR957451	Root maturation zone	N/A	N/A
SRP029238	SRR957452	Root elongation zone	N/A	N/A
SRP029238	SRR957455	Root elongation zone	N/A	N/A
SRP029238	SRR957458	Root elongation zone	N/A	N/A
SRP029238	SRR957453	Root cortex	N/A	N/A
SRP029238	SRR957456	Root cortex	N/A	N/A
SRP029238	SRR957459	Root cortex	N/A	N/A
SRP029238	SRR957454	Root maturation zone	N/A	N/A
SRP029238	SRR957457	Root maturation zone	N/A	N/A
SRP029238	SRR957460	Primary root	N/A	N/A
SRP029238	SRR957461	Primary root	N/A	N/A
SRP029238	SRR957462	Primary root	N/A	N/A
SRP029238	SRR957463	Secondary root	N/A	N/A
SRP029238	SRR957464	Secondary root	N/A	N/A
SRP029238	SRR957465	Secondary root	N/A	N/A
SRP029238	SRR957466	Mature pollen	N/A	N/A
SRP029238	SRR957467	Mature pollen	N/A	N/A
SRP029238	SRR957468	Mature pollen	N/A	N/A
SRP029238	SRR957469	Silks	N/A	N/A
SRP029238	SRR957470	Silks	N/A	N/A
SRP029238	SRR957471	Silks	N/A	N/A
SRP029238	SRR957472	Mature female spikelets	N/A	N/A
SRP029238	SRR957473	Mature female spikelets	N/A	N/A
SRP029238	SRR957474	Mature female spikelets	N/A	N/A
SRP029238	SRR957475	Internode 6-7	N/A	N/A
SRP029238	SRR957476	Internode 6-7	N/A	N/A
SRP029238	SRR957477	Internode 6-7	N/A	N/A
SRP029238	SRR957478	Internode 7-8	N/A	N/A
SRP029238	SRR957479	Internode 7-8	N/A	N/A
SRP029238	SRR957480	Internode 7-8	N/A	N/A
SRP029238	SRR957481	Vegetative Meristem; Surrounding Tissue	N/A	N/A
SRP029238	SRR957482	Vegetative Meristem; Surrounding Tissue	N/A	N/A
SRP032921	SRR1030974	primary root	4-5 days	24h treatment, control
SRP032921	SRR1030975	primary root	4-5 days	6h treatment, mild water deficit
SRP032921	SRR1030976	primary root	4-5 days	24h treatment, severe water deficit
SRP032921	SRR1030977	primary root	4-5 days	6h treatment, control
SRP032921	SRR1030978	primary root	4-5 days	24h treatment, severe water deficit
SRP032921	SRR1030979	primary root	4-5 days	6h treatment, severe water deficit
SRP032921	SRR1030980	primary root	4-5 days	6h treatment, control
SRP032921	SRR1030981	primary root	4-5 days	24h treatment, mild water deficit
SRP032921	SRR1030982	primary root	4-5 days	6h treatment, severe water deficit
SRP032921	SRR1030983	primary root	4-5 days	24h treatment, mild water deficit
SRP032921	SRR1030984	primary root	4-5 days	6h treatment, mild water deficit
SRP032921	SRR1030985	primary root	4-5 days	24h treatment, control
SRP032921	SRR1030986	primary root	4-5 days	6h treatment, control
SRP032921	SRR1030987	primary root	4-5 days	24h treatment, severe water deficit
SRP032921	SRR1030988	primary root	4-5 days	24h treatment, mild water deficit
SRP032921	SRR1030989	primary root	4-5 days	6h treatment, mild water deficit
SRP032921	SRR1030990	primary root	4-5 days	24h treatment, mild water deficit
SRP032921	SRR1030991	primary root	4-5 days	6h treatment, control
SRP032921	SRR1030992	primary root	4-5 days	24h treatment, control
SRP032921	SRR1030993	primary root	4-5 days	6h treatment, severe water deficit
SRP032921	SRR1030994	primary root	4-5 days	6h treatment, mild water deficit
SRP032921	SRR1030995	primary root	4-5 days	24h treatment, control
SRP032921	SRR1030996	primary root	4-5 days	6h treatment, severe water deficit
SRP032921	SRR1030997	primary root	4-5 days	24h treatment, severe water deficit
SRP037558	SRR1167033	Embryo	10 DAP	N/A
SRP043224	SRR1400575	Endosperm	6 DAP	N/A
SRP043224	SRR1400576	Endosperm	6 DAP	N/A
SRP043224	SRR1400577	Endosperm	6 DAP	N/A
SRP043224	SRR1400578	Endosperm	6 DAP	N/A
SRP058076	SRR2012668	Stele of shoot-borne root	63 days	Homogeneous low nitrate (24 h)
SRP058076	SRR2012672	Stele of shoot-borne root	63 days	Homogeneous low nitrate (24 h)
SRP058076	SRR2012707	Stele of shoot-borne root	63 days	Homogeneous low nitrate (24 h)
SRP058076	SRR2012709	Stele of shoot-borne root	63 days	Homogeneous low nitrate (24 h)
SRP058076	SRR2012711	Stele of shoot-borne root	63 days	Local high nitrate (24 h)
SRP058076	SRR2012713	Stele of shoot-borne root	63 days	Local high nitrate (24 h)
SRP058076	SRR2012715	Stele of shoot-borne root	63 days	Local high nitrate (24 h)
SRP058076	SRR2012717	Stele of shoot-borne root	63 days	Local high nitrate (24 h)
SRP059655	SRR2070626	leaf	N/A	sufficient nitrogen
SRP059655	SRR2070627	leaf	N/A	limited nitrogen
SRP060587	SRR2095065	whole crown root	14 days	N/A
SRP060587	SRR2095195	whole crown root	14 days	N/A
SRP060587	SRR2095196	whole crown root	14 days	N/A
SRP060587	SRR2095295	whole crown root	14 days	N/A
SRP060587	SRR2095499	whole primary root	4 days	N/A
SRP060587	SRR2095541	whole primary root	4 days	N/A
SRP060587	SRR2095924	whole primary root	4 days	N/A
SRP060587	SRR2095934	whole primary root	4 days	N/A
SRP060587	SRR2095961	whole seminal root	7 days	N/A
SRP060587	SRR2095969	whole seminal root	7 days	N/A
SRP060587	SRR2095985	whole seminal root	7 days	N/A
SRP060587	SRR2095986	whole seminal root	7 days	N/A
SRP062027	SRR2144382	Leaf	V12	control
SRP062027	SRR2144383	Leaf	V12	control
SRP062027	SRR2144384	Leaf	V12	control
SRP062027	SRR2144385	Leaf	V12	control
SRP062027	SRR2144386	Ear	V12	control
SRP062027	SRR2144387	Ear	V12	control
SRP062027	SRR2144388	Ear	V12	control
SRP062027	SRR2144389	Ear	V12	control
SRP062027	SRR2144390	Leaf	V14	control
SRP062027	SRR2144391	Leaf	V14	control
SRP062027	SRR2144392	Leaf	V14	control
SRP062027	SRR2144393	Leaf	V14	control
SRP062027	SRR2144394	Ear	V14	control
SRP062027	SRR2144395	Ear	V14	control
SRP062027	SRR2144396	Ear	V14	control
SRP062027	SRR2144397	Ear	V14	control
SRP062027	SRR2144398	Leaf	V16	control
SRP062027	SRR2144399	Leaf	V16	control
SRP062027	SRR2144400	Leaf	V16	control
SRP062027	SRR2144401	Leaf	V16	control
SRP062027	SRR2144402	Ear	V16	control
SRP062027	SRR2144403	Ear	V16	control
SRP062027	SRR2144404	Ear	V16	control
SRP062027	SRR2144405	Ear	V16	control
SRP062027	SRR2144406	Leaf	R1	control
SRP062027	SRR2144407	Leaf	R1	control
SRP062027	SRR2144408	Leaf	R1	control
SRP062027	SRR2144409	Leaf	R1	control
SRP062027	SRR2144410	Ear	R1	control
SRP062027	SRR2144411	Ear	R1	control
SRP062027	SRR2144412	Ear	R1	control
SRP062027	SRR2144413	Ear	R1	control
SRP062027	SRR2144414	Leaf	V12	drought
SRP062027	SRR2144415	Leaf	V12	drought
SRP062027	SRR2144416	Leaf	V12	drought
SRP062027	SRR2144417	Leaf	V12	drought
SRP062027	SRR2144418	Ear	V12	drought
SRP062027	SRR2144419	Ear	V12	drought
SRP062027	SRR2144420	Ear	V12	drought
SRP062027	SRR2144421	Ear	V12	drought
SRP062027	SRR2144422	Leaf	V14	drought
SRP062027	SRR2144423	Leaf	V14	drought
SRP062027	SRR2144424	Leaf	V14	drought
SRP062027	SRR2144425	Leaf	V14	drought
SRP062027	SRR2144426	Ear	V14	drought
SRP062027	SRR2144427	Ear	V14	drought
SRP062027	SRR2144428	Ear	V14	drought
SRP062027	SRR2144429	Ear	V14	drought
SRP062027	SRR2144430	Leaf	V16	drought
SRP062027	SRR2144431	Leaf	V16	drought
SRP062027	SRR2144432	Leaf	V16	drought
SRP062027	SRR2144433	Leaf	V16	drought
SRP062027	SRR2144434	Ear	V16	drought
SRP062027	SRR2144435	Ear	V16	drought
SRP062027	SRR2144436	Ear	V16	drought
SRP062027	SRR2144437	Ear	V16	drought
SRP062027	SRR2144438	Leaf	R1	drought
SRP062027	SRR2144439	Leaf	R1	drought
SRP062027	SRR2144440	Leaf	R1	drought
SRP062027	SRR2144441	Leaf	R1	drought
SRP062027	SRR2144442	Ear	R1	drought
SRP062027	SRR2144443	Ear	R1	drought
SRP062027	SRR2144444	Ear	R1	drought
SRP062027	SRR2144445	Ear	R1	drought
SRP062027	SRR2144446	Tassel	V12	control
SRP062027	SRR2144447	Tassel	V12	control
SRP062027	SRR2144448	Tassel	V12	control
SRP062027	SRR2144449	Tassel	V12	control
SRP062027	SRR2144450	Tassel	V14	control
SRP062027	SRR2144451	Tassel	V14	control
SRP062027	SRR2144452	Tassel	V14	control
SRP062027	SRR2144453	Tassel	V14	control
SRP062027	SRR2144454	Tassel	V16	control
SRP062027	SRR2144455	Tassel	V16	control
SRP062027	SRR2144456	Tassel	V16	control
SRP062027	SRR2144457	Tassel	V16	control
SRP062027	SRR2144458	Tassel	R1	control
SRP062027	SRR2144459	Tassel	R1	control
SRP062027	SRR2144460	Tassel	R1	control
SRP062027	SRR2144461	Tassel	V12	drought
SRP062027	SRR2144462	Tassel	V12	drought
SRP062027	SRR2144463	Tassel	V12	drought
SRP062027	SRR2144464	Tassel	V14	drought
SRP062027	SRR2144465	Tassel	V14	drought
SRP062027	SRR2144466	Tassel	V14	drought
SRP062027	SRR2144467	Tassel	V14	drought
SRP062027	SRR2144468	Tassel	V16	drought
SRP062027	SRR2144469	Tassel	V16	drought
SRP062027	SRR2144470	Tassel	V16	drought
SRP062027	SRR2144471	Tassel	V16	drought
SRP062027	SRR2144472	Tassel	R1	drought
SRP062027	SRR2144473	Tassel	R1	drought
SRP062027	SRR2144474	Tassel	R1	drought
SRP062027	SRR2144475	Tassel	R1	drought
SRP068070	SRR3084815	Shoot	4 days after germination	control for shade treatment
SRP068070	SRR3084818	Shoot	4 days after germination	control for shade treatment
SRP068070	SRR3084821	Shoot	4 days after germination	control for shade treatment
SRP068070	SRR3084824	Shoot	4 days after germination	control for shade treatment
SRP068070	SRR3084830	Shoot	4 days after germination	1h shade
SRP068070	SRR3084837	Shoot	4 days after germination	1h shade
SRP068070	SRR3084838	Shoot	4 days after germination	1h shade
SRP068070	SRR3084843	Shoot	4 days after germination	1h shade
SRP068070	SRR3084851	Shoot	4 days after germination	3h shade
SRP068070	SRR3084857	Shoot	4 days after germination	3h shade
SRP068070	SRR3084866	Shoot	4 days after germination	3h shade
SRP068070	SRR3084882	Shoot	4 days after germination	6h shade
SRP068070	SRR3085202	Shoot	4 days after germination	6h FR
SRP068070	SRR3085203	Shoot	4 days after germination	6h FR
SRP068070	SRR3085204	Shoot	4 days after germination	6h FR
SRP068070	SRR3085205	Shoot	4 days after germination	6h shade
SRP068070	SRR3085206	Shoot	4 days after germination	6h shade
SRP068070	SRR3085207	Shoot	4 days after germination	6h shade
SRP068070	SRR3085210	Shoot	4 days after germination	control for FR treatment
SRP068070	SRR3085211	Shoot	4 days after germination	control for FR treatment
SRP068070	SRR3085212	Shoot	4 days after germination	control for FR treatment
SRP068070	SRR3085215	Shoot	4 days after germination	1h FR
SRP068070	SRR3085216	Shoot	4 days after germination	1h FR
SRP068070	SRR3085217	Shoot	4 days after germination	1h FR
SRP068070	SRR3085218	Shoot	4 days after germination	3h FR
SRP068070	SRR3085219	Shoot	4 days after germination	3h FR
SRP068070	SRR3085220	Shoot	4 days after germination	3h FR
SRP073222	SRR3371876	Seedling	10-days growing	Seedling
SRP073222	SRR3372478	Seedling	10-days growing	Control for cold stress treatment
SRP074850	SRR3498310	Upper Leaf	N/A	minimal infection by C. zeina
SRP074850	SRR3498311	Lower Leaf	N/A	severe infection by C. zeina
SRP074850	SRR3498312	Upper Leaf	N/A	minimal infection by C. zeina
SRP074850	SRR3498313	Lower Leaf	N/A	severe infection by C. zeina
SRP074850	SRR3498314	Upper Leaf	N/A	minimal infection by C. zeina
SRP074850	SRR3498315	Lower Leaf	N/A	severe infection by C. zeina
SRP075906	SRR3608768	Leaf blade	110 days	control
SRP075906	SRR3608769	Leaf blade	110 days	salt stressed
SRP075906	SRR3608770	Leaf blade	110 days	control
SRP075906	SRR3608771	Leaf blade	110 days	salt stressed
SRP075906	SRR3608772	Leaf blade	110 days	control
SRP075906	SRR3608773	Leaf blade	110 days	salt stressed
SRP075906	SRR3621728	Leaf blade	110 days	salt stressed
SRP077762	SRR3740177	Primary and seminal roots	3 days after germination	N/A
SRP077762	SRR3740178	Primary and seminal roots	3 days after germination	N/A
SRP077762	SRR3740179	Primary and seminal roots	3 days after germination	N/A
SRP079373	SRR3948272	rtcs Embryo	25 DAP	N/A
SRP079373	SRR3948281	rtcs Embryo	25 DAP	N/A
SRP079373	SRR3948287	rtcs Embryo	25 DAP	N/A
SRP079373	SRR3948293	rtcs Embryo	25 DAP	N/A
SRP079373	SRR3948296	rtcs Embryo	30 DAP	N/A
SRP079373	SRR3948298	rtcs Embryo	30 DAP	N/A
SRP079373	SRR3948306	rtcs Embryo	30 DAP	N/A
SRP079373	SRR3948308	rtcs Embryo	30 DAP	N/A
SRP079373	SRR3948312	rtcs Embryo	35 DAP	N/A
SRP079373	SRR3948315	rtcs Embryo	35 DAP	N/A
SRP079373	SRR3948316	rtcs Embryo	35 DAP	N/A
SRP079373	SRR3948317	rtcs Embryo	35 DAP	N/A
SRP079373	SRR3948319	WT Embryo	25 DAP	N/A
SRP079373	SRR3948320	WT Embryo	25 DAP	N/A
SRP079373	SRR3948321	WT Embryo	25 DAP	N/A
SRP079373	SRR3948322	WT Embryo	25 DAP	N/A
SRP079373	SRR3948323	WT Embryo	30 DAP	N/A
SRP079373	SRR3948325	WT Embryo	30 DAP	N/A
SRP079373	SRR3948326	WT Embryo	30 DAP	N/A
SRP079373	SRR3948327	WT Embryo	30 DAP	N/A
SRP079373	SRR3948332	WT Embryo	35 DAP	N/A
SRP079373	SRR3948333	WT Embryo	35 DAP	N/A
SRP079373	SRR3948334	WT Embryo	35 DAP	N/A
SRP079373	SRR3948335	WT Embryo	35 DAP	N/A
SRP098550	SRR5217079	Inner stem tissue V2 seedling	N/A	N/A
SRP098550	SRR5217080	Inner stem tissue V2 seedling	N/A	N/A
SRP098550	SRR5217081	Inner stem tissue V2 seedling	N/A	N/A
SRP098550	SRR5217082	Inner stem tissue V2 seedling	N/A	N/A
SRP098550	SRR5217083	Inner stem tissue V2 seedling	N/A	N/A
SRP098550	SRR5217084	Inner stem tissue V2 seedling	N/A	N/A
SRP098550	SRR5217085	Inner stem tissue V2 seedling	N/A	N/A
SRP098550	SRR5217086	Inner stem tissue V2 seedling	N/A	N/A
SRP098550	SRR5217087	Inner layer husk, stage silk emerging 2-5 cm	N/A	N/A
SRP098550	SRR5217088	Inner layer husk, stage silk emerging 2-5 cm	N/A	N/A
SRP098550	SRR5217089	Inner layer husk, stage silk emerging 2-5 cm	N/A	N/A
SRP098550	SRR5217090	Inner layer husk, stage silk emerging 2-5 cm	N/A	N/A
SRP098550	SRR5217091	Inner layer husk, stage silk emerging 2-5 cm	N/A	N/A
SRP098550	SRR5217092	Inner layer husk, stage silk emerging 2-5 cm	N/A	N/A
SRP098550	SRR5217093	Inner layer husk, stage silk emerging 2-5 cm	N/A	N/A
SRP098550	SRR5217094	Inner layer husk, stage silk emerging 2-5 cm	N/A	N/A
SRP098550	SRR5217095	Inner layer husk, stage silk emerging 2-5 cm	N/A	N/A
SRP098550	SRR5217096	Inner layer husk, stage silk emerging 2-5 cm	N/A	N/A
SRP101358	SRR5312204	Aleurone cells	18 DAP	N/A
SRP101358	SRR5312205	Aleurone cells	18 DAP	N/A
SRP101358	SRR5312206	Aleurone cells	22 DAP	N/A
SRP101358	SRR5312207	Aleurone cells	22 DAP	N/A
SRP101358	SRR5312208	Starchy endosperm cells	18 DAP	N/A
SRP101358	SRR5312209	Starchy endosperm cells	18 DAP	N/A
SRP101358	SRR5312210	Starchy endosperm cells	22 DAP	N/A
SRP101358	SRR5312211	Starchy endosperm cells	22 DAP	N/A
SRP105764	SRR5488449	Sperm Cell	N/A	N/A
SRP105764	SRR5488450	Sperm Cell	N/A	N/A
SRP105764	SRR5488451	Sperm Cell	N/A	N/A
SRP105764	SRR5488452	Egg Cell	N/A	N/A
SRP105764	SRR5488453	Egg Cell	N/A	N/A
SRP105764	SRR5488454	Egg Cell	N/A	N/A
SRP105764	SRR5488455	Zygote	12 HAP	N/A
SRP105764	SRR5488456	Zygote	12 HAP	N/A
SRP105764	SRR5488457	Zygote	12 HAP	N/A
SRP105764	SRR5488458	Zygote	24 HAP	N/A
SRP105764	SRR5488459	Zygote	24 HAP	N/A
SRP105764	SRR5488460	Zygote	24 HAP	N/A
SRP105764	SRR5488461	Apical Cell	N/A	N/A
SRP105764	SRR5488462	Apical Cell	N/A	N/A
SRP105764	SRR5488463	Apical Cell	N/A	N/A
SRP105764	SRR5488464	Basal Cell	N/A	N/A
SRP105764	SRR5488465	Basal Cell	N/A	N/A
SRP105764	SRR5488466	Basal Cell	N/A	N/A
SRP109545	SRR5691791	Leaf	V4-22 days old	non-infested
SRP109545	SRR5691793	Leaf	V4-22 days old	non-infested
SRP109545	SRR5691795	Leaf	V4-22 days old	non-infested
SRP109545	SRR5691797	Leaf	V4-22 days old	non-infested
SRP109545	SRR5691799	Leaf	V4-22 days old	wounded 2hr
SRP109545	SRR5691801	Leaf	V4-22 days old	wounded 2hr
SRP109545	SRR5691803	Leaf	V4-22 days old	wounded 2hr
SRP109545	SRR5691805	Leaf	V4-22 days old	wounded 2hr
SRP109545	SRR5691807	Leaf	V4-22 days old	wounded 24hr
SRP109545	SRR5691808	Leaf	V4-22 days old	wounded 24hr
SRP109545	SRR5691809	Leaf	V4-22 days old	wounded 24hr
SRP109545	SRR5691810	Leaf	V4-22 days old	wounded 24hr
SRP109545	SRR5691811	Leaf	V4-22 days old	TSSM-infested 2hr
SRP109545	SRR5691812	Leaf	V4-22 days old	TSSM-infested 2hr
SRP109545	SRR5691813	Leaf	V4-22 days old	TSSM-infested 2hr
SRP109545	SRR5691814	Leaf	V4-22 days old	TSSM-infested 2hr
SRP109545	SRR5691815	Leaf	V4-22 days old	TSSM-infested 24hr
SRP109545	SRR5691816	Leaf	V4-22 days old	TSSM-infested 24hr
SRP109545	SRR5691817	Leaf	V4-22 days old	TSSM-infested 24hr
SRP109545	SRR5691818	Leaf	V4-22 days old	TSSM-infested 24hr
SRP109545	SRR5691819	Leaf	V4-22 days old	BGM-infested 2hr
SRP109545	SRR5691820	Leaf	V4-22 days old	BGM-infested 2hr
SRP109545	SRR5691821	Leaf	V4-22 days old	BGM-infested 2hr
SRP109545	SRR5691822	Leaf	V4-22 days old	BGM-infested 2hr
SRP109545	SRR5691823	Leaf	V4-22 days old	BGM-infested 24hr
SRP109545	SRR5691824	Leaf	V4-22 days old	BGM-infested 24hr
SRP109545	SRR5691825	Leaf	V4-22 days old	BGM-infested 24hr
SRP109545	SRR5691826	Leaf	V4-22 days old	BGM-infested 24hr
SRP116297	SRR5983964	Endosperm	20 DAP	N/A
SRP116297	SRR5983965	Endosperm	15 DAP	N/A
SRP116297	SRR5983966	Endosperm	9 DAP	N/A
SRP116297	SRR5983967	Embryo	20 DAP	N/A
SRP116297	SRR5983968	Embryo	15 DAP	N/A
SRP116297	SRR5983969	Embryo	9 DAP	N/A
SRP118717	SRR6061625	Primary and seminal roots	3 days after germination	N/A
SRP118717	SRR6061626	Primary and seminal roots	3 days after germination	N/A
SRP118717	SRR6061627	Primary and seminal roots	3 days after germination	N/A
